# Supplementary material
Source: PubMed Central journal article supplement (PMC3647237)
Supplement: cdd201315x1.pdf [file cdd201315x1.pdf]

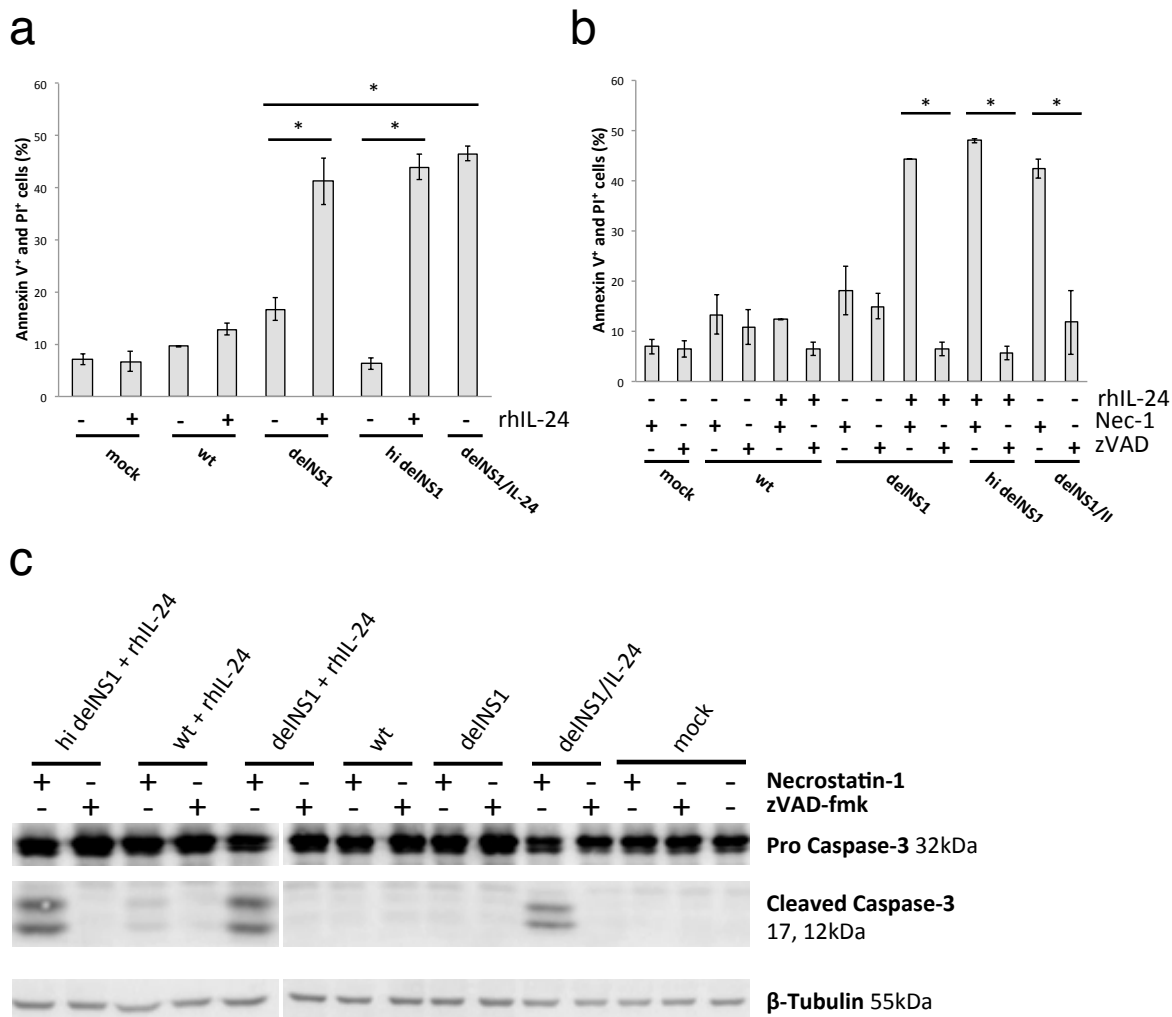

**Figure S1.: Effect of IL-24 and/or virus stimulation on apoptosis in SK-Mel28 cells.**

Apoptosis was determined by AnnexinV/PI staining of cells 24 hours after stimulation with IL-24 and/or viral infection. Experiments done in a) and b) were performed in parallel. Mean percentage and S.E.M. of AnnexinV- and PI-positive cells of three independent experiments is shown. \*:p<0.05

a) Effect of rhIL24 (100ng/ml) on cells which were infected with wt, delNS1, delNS1/IL-24 or hi-delNS1 virus (moi=1) as indicated on the bottom. b) Effect of zVAD (10μM) and Necrostatin-1 (Nec-1) (50μM) on virus-stimulated cells in absence versus presence of IL-24 as indicated on the bottom. c) SK-Mel28 cells were infected with wt, delNS1, delNS1/IL-24 and hi-delNS1 (moi=1) alone or in combination with rhIL-24 (100ng/ml). Experiments were performed in the presence of 50μM Nec-1 or 10μM zVAD. One representative western blot out of three independent experiments of caspase-3 cleavage is shown.
