# Supplementary material
Source: PubMed Central journal article supplement (PMC3647237)
Supplement: cdd201315x2.pdf [file cdd201315x2.pdf]

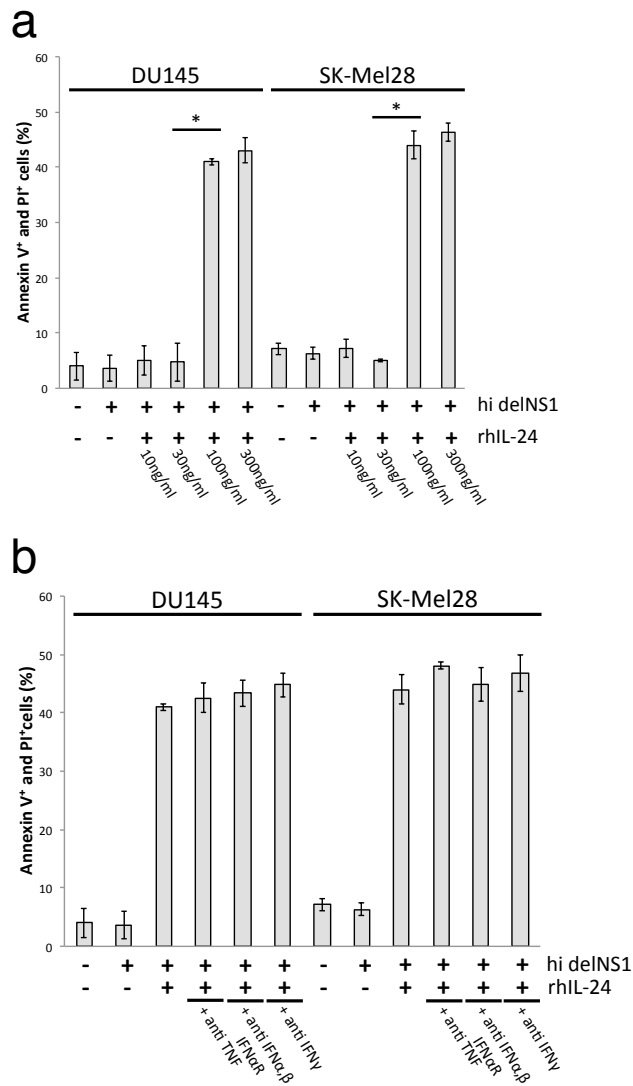

**Figure S2.**

(a) Titration of rhIL-24 in DU145 and SK-Mel28 cells to assess minimal concentration of rhIL-24 capable of promoting virus-induced cell death:

DU145 and SK-Mel28 cells were stimulated with increasing concentrations of rhIL-24 in presence of hi-delINS1 for 24 hours and cell death was assessed by Annexin V/PI staining. Mean percentage and S.E.M. of AnnexinV- and PI-positive cells of three independent experiments is shown. \*:p<0.05

(b) hi-delINS1/rhIL-24-induced apoptosis is independent of TNF, type I or type II IFNs:

DU145 and SK-Mel28 cells were treated for 24 hours with hi-delINS1 virus alone and in combination with rhIL-24 (100ng/ml) in presence versus absence of anti-TNF (20 $\mu$ g/ml), anti-IFN $\alpha$  (5,000 neutralizing U/ml), anti-IFN $\beta$  (2,000 neutralizing U/ml), anti-IFN $\alpha$ / $\beta$  receptor chain 2 (20 $\mu$ g/ml) in combination or anti-IFN $\gamma$  (20 $\mu$ g/ml) antibodies as indicated at the bottom. Cell lines are indicated at the top. Mean percentage and S.E.M. of AnnexinV- and PI-positive cells of three independent experiments is shown. \*:p<0.05
