# Supplementary material
Source: PubMed Central journal article supplement (PMC3647237)
Supplement: cdd201315x3.pdf [file cdd201315x3.pdf]

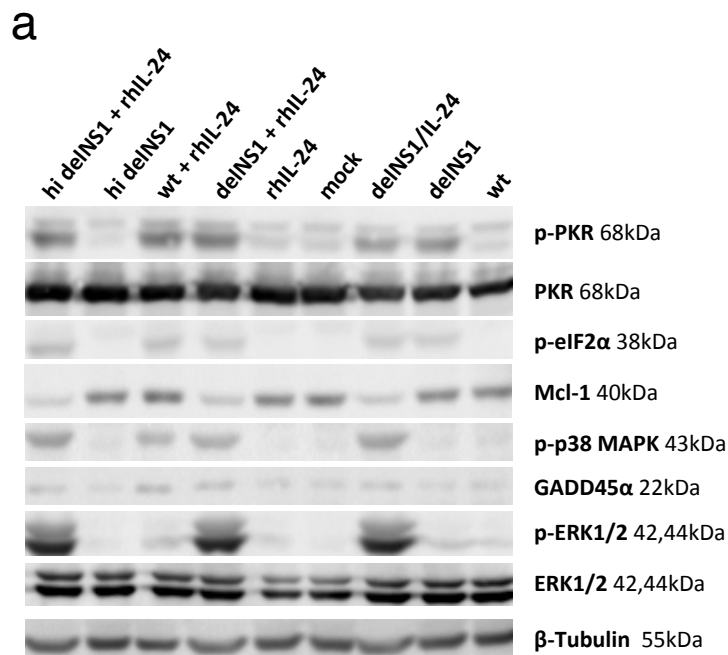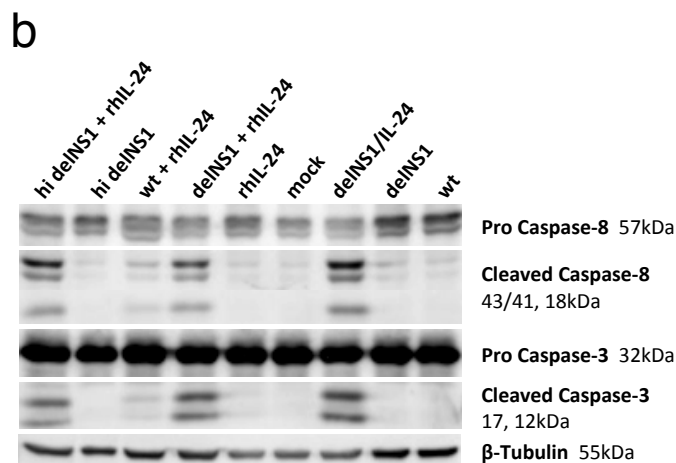

**Figure S3: Proapoptotic signaling cascades are induced by delNS1/IL-24 virus in SK-Mel28 cells.**

(a) SK-Mel28 cells were infected with wt, delNS1, delNS1/IL-24, hi-delNS1 (moi=1) alone or in combination with rhIL-24 (100ng/ml) for 24 hours as indicated. Protein expression level of p-PKR, PKR, p-eIF2α, Mcl-1, p-p38 MAPK, GADD45α, p-ERK1/2 and ERK1/2 was determined by western blot analysis as indicated on the right. One representative western blot out of three experiments is shown. (b) Cells were infected with wt, delNS1, delNS1/IL-24, hi-delNS1 (moi=1) or in combination with rhIL-24 (100ng/ml) for 24 hours as indicated on the top. Protein expression level of caspase-8 and caspase-3 was determined by western blot analysis. One representative western blot out of three independent experiments is shown.
