# Supplementary material
Source: PubMed Central journal article supplement (PMC3647237)
Supplement: cdd201315x4.pdf [file cdd201315x4.pdf]

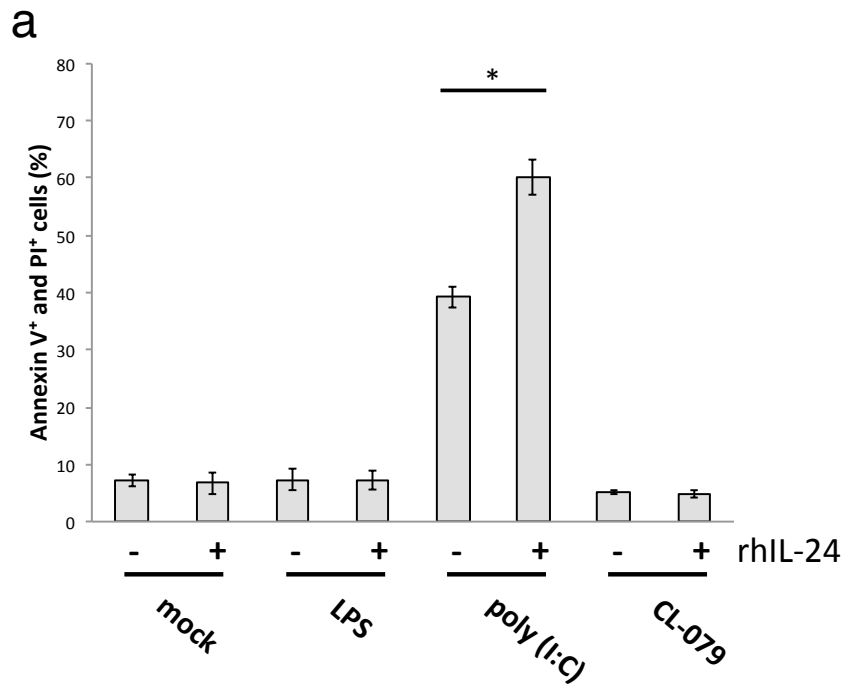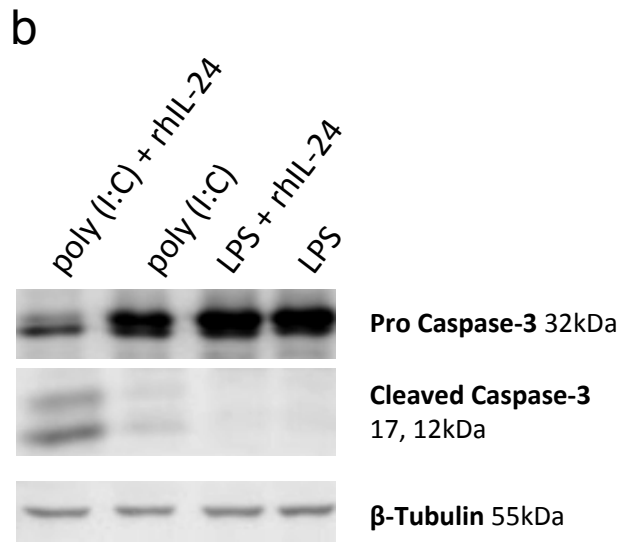

**Figure S4.: IL-24 specifically sensitizes to TLR3-mediated cell death in SK-Mel28 cells**

(a) Cells were treated with LPS (100ng/ml), poly(I:C) (2 $\mu$ g/ml) or CL-097 (2,5 $\mu$ g/ml) for 24 hours alone or in combination with rhIL-24 (100ng/ml) as indicated. Apoptosis was determined by AnnexinV/PI staining. Mean percentage and S.E.M. of AnnexinV- and PI-positive cells of three independent experiments is shown. \*:p<0.05(b) Cells were treated for 24 hours with LPS and poly(I:C) alone or in combination with rhIL-24. One representative western blot of caspase-3 cleavage out of three independent experiments is shown.
