# Supplementary material
Source: PubMed Central journal article supplement (PMC3647237)
Supplement: cdd201315x5.pdf [file cdd201315x5.pdf]

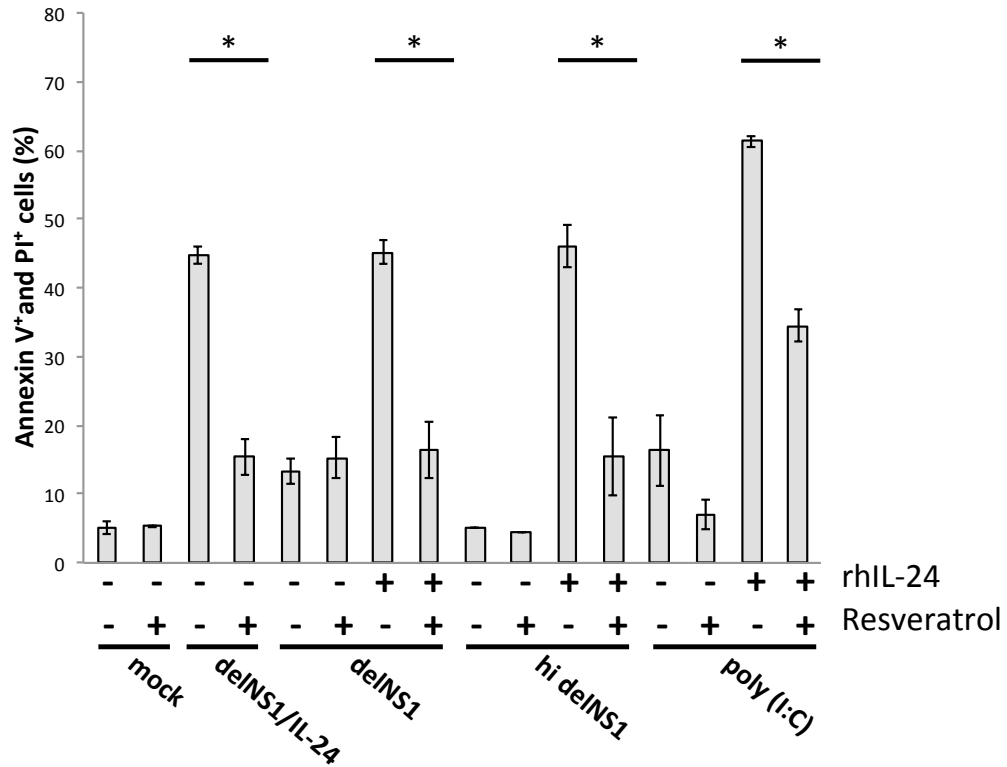

**Figure S5.: Effect of Resveratrol and IL-24 and/or virus stimulation on SK-Mel28 cells**

Cells were treated with 50 $\mu$ M Resveratrol after infection with deINS1, deINS1/IL-24, hi-deINS1 (moi=1) and poly(I:C) (2 $\mu$ g/ml) alone or in combination with rhIL-24 (100ng/ml) for 24 hours. Apoptosis was determined by AnnexinV/PI staining, followed by flow cytometric analysis. Mean percentage and S.E.M. of AnnexinV- and PI-positive cells of three independent experiments is shown. \*:p<0.05.
