# Supplementary material
Source: PubMed Central journal article supplement (PMC3647237)
Supplement: cdd201315x6.pdf [file cdd201315x6.pdf]

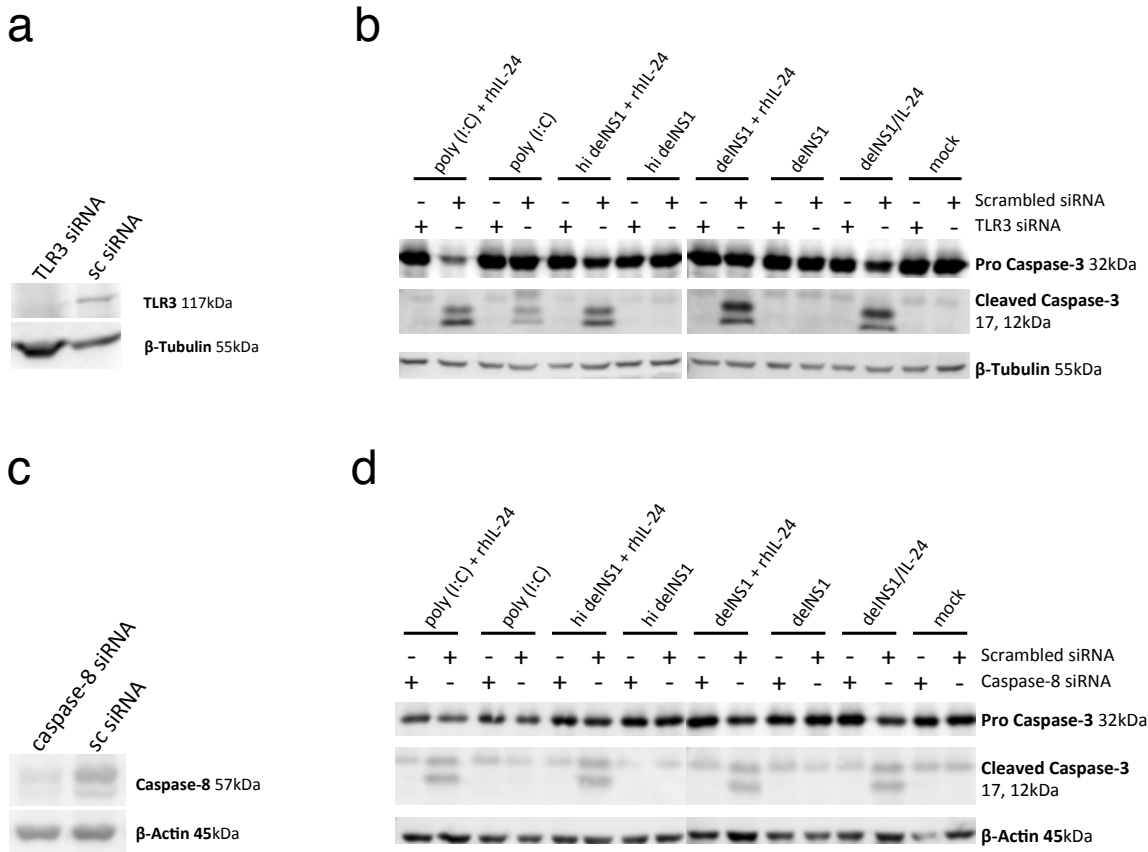

**Figure S6.: The effect of TLR3 and caspase-8 silencing on SK-Mel28 cells after IL-24 and/or virus stimulation.**

(a) Reduction of TLR3 expression by siRNA as determined by western blot analysis. (b) Scrambled or TLR3 siRNA transfected SK-Mel28 cells were infected for 24 hours with wt., deINS1, deINS1/IL-24, hi-deINS1 (moi=1) or poly (I:C) (2µg/ml) alone or in combination with rhIL-24 (100ng/ml). Cleavage of caspase-3 was determined by western blot analysis. One representative image out of three independent experiments is shown. (c) Reduction of caspase-8 expression by siRNA as determined by western blot analysis of the caspase-8 protein. (d) Scrambled or caspase-8 siRNA transfected SK-Mel28 cells were infected for 24 hours with wt, deINS1, deINS1/IL-24, hi-deINS1 virus (moi=1) or poly(I:C) (2µg/ml) alone or in combination with rhIL-24 (100ng/ml). Cleavage of caspase-3 was determined by western blot analysis. One representative image out of three independent experiments is shown.
