# Supplementary material
Source: PubMed Central journal article supplement (PMC3647237)
Supplement: cdd201315x7.pdf [file cdd201315x7.pdf]

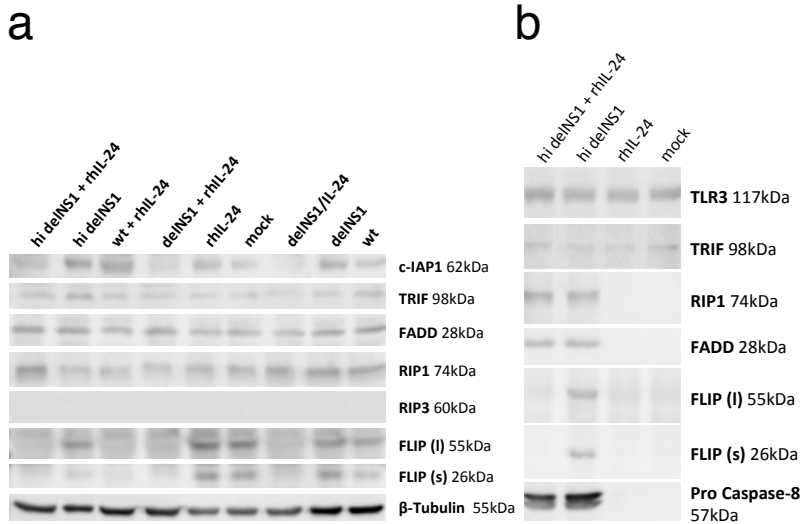

**Figure S7: Effect of IL-24 and/or virus stimulation on proteins involved in apoptosis induction and on TLR3 DISC formation in SK-Mel28 cells.**

(a) Cells were infected with wt, deINS1, deINS1/IL-24, hi-deINS1 (moi=1) alone or in combination with rhIL-24 (100ng/ml) for 24 hours as indicated on the top. Protein expression level of cIAP1, TRIF, FADD, RIP1, RIP3, cFLIP<sub>L</sub> and cFLIP<sub>S</sub> was determined by western blot analysis. One representative western blot out of three independent experiments is shown. (b) Cells were left untreated or treated with rhIL-24 alone, infected with hi-deINS1 (moi=1) alone or in combination with rhIL-24 (100ng/ml) for 24 hours. TLR3 was immunoprecipitated and subjected to western blot analysis for the proteins indicated. One representative image out of three independent experiments is shown.
