# Supplementary material
Source: PubMed Central journal article supplement (PMC3647237)
Supplement: cdd201315x8.pdf [file cdd201315x8.pdf]

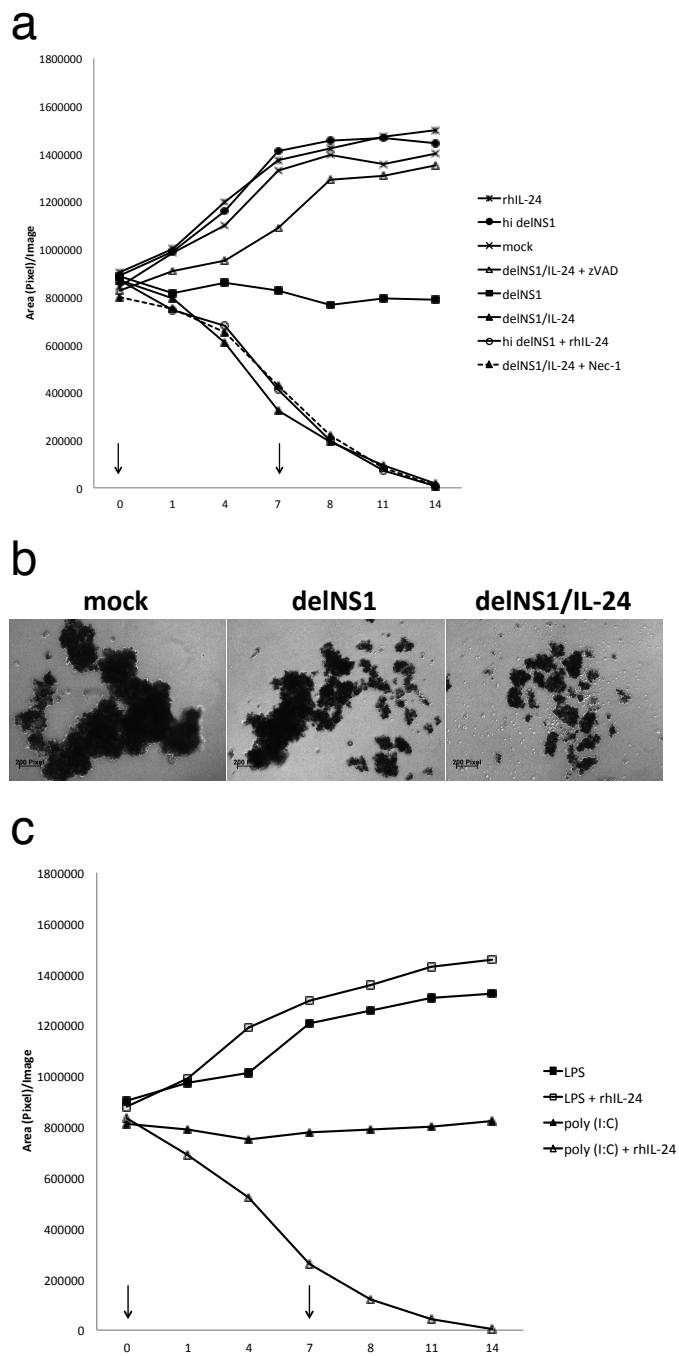

**Figure S8: Effect of delNS1/IL-24 virus on spheroid formation of SK-Mel28 cells.**

(a) Spheroids were infected with delNS1, delNS1/IL-24, hi-delNS1 (moi=1) alone or in combination with rhIL-24 (100ng/ml). In samples indicated, zVAD or Nec-1 was added to the cultures. Re-infections of spheroids were performed weekly, as indicated with arrows. Growth of spheroids was determined by ImageJ 1.440 software. (b) Representative images of SK-Mel28 spheroids treated with delNS1 and delNS1/IL-24 (moi=1) four days after 2nd infection are shown (scale bar = 200 pixel). (c) Spheroids were treated with LPS (100ng/ml) or poly(I:C) (2µg/ml) alone or in combination with rhIL-24.
